# Supplementary material for: The Selection of the Optimal Impregnation Conditions of Vegetable Matrices with Iodine
Source: MDPI journal article supplement (doi:10.3390/molecules27103351), 2022-05-23
Supplement: s1 [file s1]

**Table S1.** The colour parameters of fortified pumpkin with KI.

| Hydration      | Temperature<br>[°C] | Time<br>[hours] | The colour parameters |      |      |      |       |
|----------------|---------------------|-----------------|-----------------------|------|------|------|-------|
|                |                     |                 | L                     | a    | b    | C    | h     |
| hydration 1:1. | 4                   | 1               | 58.65                 | 3.02 | 4.29 | 5.52 | 57.99 |
|                |                     | 2               | 58.55                 | 3.11 | 5.14 | 5.84 | 56.99 |
|                |                     | 6               | 58.68                 | 3.08 | 4.86 | 5.7  | 58.48 |
|                |                     | 12              | 58.74                 | 3.05 | 4.79 | 5.68 | 57.51 |
|                | -21                 | 1               | 58.71                 | 3.02 | 4.72 | 5.6  | 57.41 |
|                |                     | 2               | 58.67                 | 3.06 | 4.76 | 5.67 | 57.68 |
|                |                     | 6               | 58.24                 | 3.07 | 4.74 | 5.65 | 57.04 |
|                |                     | 12              | 57.80                 | 3.02 | 4.88 | 5.74 | 58.28 |
|                | -76                 | 1               | 58.93                 | 3.06 | 4.1  | 5.41 | 57.9  |
|                |                     | 2               | 58.68                 | 3.21 | 3.79 | 5.41 | 56.41 |
|                |                     | 6               | 58.69                 | 3.11 | 4.03 | 5.44 | 56.23 |
|                |                     | 12              | 58.47                 | 3.09 | 4.31 | 5.53 | 57.17 |
| hydration 1:2. | 4                   | 1               | 58.68                 | 3.02 | 4.71 | 5.48 | 59.45 |
|                |                     | 2               | 58.59                 | 3.58 | 3.64 | 5.1  | 55.97 |
|                |                     | 6               | 58.70                 | 3.47 | 3.71 | 5.08 | 56.12 |
|                |                     | 12              | 58.52                 | 3.02 | 3.59 | 5.07 | 57.01 |
|                | -21                 | 1               | 58.12                 | 3.85 | 4.21 | 5.13 | 59.06 |
|                |                     | 2               | 58.52                 | 3.39 | 2.03 | 5.17 | 57.03 |
|                |                     | 6               | 59.65                 | 3.49 | 2.21 | 5.12 | 57.71 |
|                |                     | 12              | 59.32                 | 3.72 | 3.98 | 5.61 | 57.69 |
|                | -76                 | 1               | 59.54                 | 3.61 | 4.03 | 5.09 | 56.55 |
|                |                     | 2               | 59.51                 | 3.73 | 4.21 | 4.99 | 57.03 |
|                |                     | 6               | 59.33                 | 3.74 | 3.98 | 5.12 | 56.21 |
|                |                     | 12              | 59.47                 | 3.66 | 3.68 | 5.19 | 56.89 |
| hydration 1:4. | 4                   | 1               | 58.62                 | 2.75 | 4.11 | 4.94 | 56.22 |
|                |                     | 2               | 58.08                 | 3.21 | 3.73 | 4.92 | 55.28 |
|                |                     | 6               | 57.39                 | 3.1  | 4.11 | 5.15 | 56.89 |
|                |                     | 12              | 57.61                 | 3.17 | 4.02 | 5.12 | 54.63 |
|                | -21                 | 1               | 57.78                 | 3.16 | 3.9  | 5.02 | 55.87 |
|                |                     | 2               | 57.90                 | 3.08 | 3.97 | 5.03 | 56.98 |
|                |                     | 6               | 58.41                 | 2.85 | 3.89 | 5.21 | 56.82 |
|                |                     | 12              | 58.72                 | 2.87 | 4.22 | 5.11 | 57.03 |
|                | -76                 | 1               | 58.64                 | 2.91 | 4.09 | 5.02 | 55.45 |
|                |                     | 2               | 58.68                 | 3.02 | 4.03 | 5.03 | 53.18 |
|                |                     | 6               | 58.64                 | 3.14 | 3.79 | 4.92 | 55.65 |
|                |                     | 12              | 58.62                 | 2.96 | 4.00 | 5.06 | 55.63 |

**Table S2.** The colour parameters of fortified pumpkin with KIO<sub>3</sub>.

| Hydration      | Temperature<br>[°C] | Time<br>[hours] | The colour parameters |      |      |      |       |
|----------------|---------------------|-----------------|-----------------------|------|------|------|-------|
|                |                     |                 | L                     | a    | b    | C    | h     |
| hydration 1:1. | 4                   | 1               | 58.45                 | 3.01 | 4.3  | 5.21 | 57.99 |
|                |                     | 2               | 58.46                 | 3.1  | 5.11 | 5.84 | 56.21 |
|                |                     | 6               | 58.68                 | 3.08 | 4.86 | 5.7  | 56.62 |
|                |                     | 12              | 58.59                 | 3.58 | 3.64 | 5.1  | 55.97 |
|                | -21                 | 1               | 58.7                  | 3.47 | 3.71 | 5.08 | 56.12 |
|                |                     | 2               | 58.52                 | 3.02 | 3.59 | 5.07 | 57.01 |
|                |                     | 6               | 58.11                 | 3.81 | 4.22 | 5.11 | 57.21 |
|                |                     | 12              | 58.26                 | 3.29 | 3.98 | 5.01 | 57.09 |
|                | -76                 | 1               | 59.65                 | 3.49 | 3.01 | 5.12 | 57.71 |
|                |                     | 2               | 59.32                 | 3.72 | 3.98 | 5.61 | 55.49 |
|                |                     | 6               | 59.54                 | 3.21 | 4.03 | 5.09 | 56.55 |
|                |                     | 12              | 59.51                 | 3.71 | 4.21 | 4.99 | 55.1  |
| hydration 1:2. | 4                   | 1               | 59.33                 | 3.74 | 3.98 | 5.12 | 55.23 |
|                |                     | 2               | 59.47                 | 3.66 | 3.68 | 5.19 | 56.89 |
|                |                     | 6               | 58.62                 | 2.75 | 4.09 | 4.94 | 56.22 |
|                |                     | 12              | 58.08                 | 3.21 | 3.73 | 4.92 | 55.28 |
|                | -21                 | 1               | 58.31                 | 3.1  | 4.11 | 5.15 | 55.34 |
|                |                     | 2               | 57.60                 | 3.17 | 4.02 | 5.12 | 54.63 |
|                |                     | 6               | 58.03                 | 3.16 | 3.41 | 4.98 | 57.24 |
|                |                     | 12              | 58.07                 | 3.01 | 3.97 | 5.03 | 56.98 |
|                | -76                 | 1               | 58.31                 | 3.02 | 4.02 | 5.21 | 56.82 |
|                |                     | 2               | 58.19                 | 2.99 | 4.01 | 5.11 | 55.75 |
|                |                     | 6               | 58.71                 | 3.01 | 3.99 | 5.02 | 55.45 |
|                |                     | 12              | 58.66                 | 2.99 | 4.01 | 5.03 | 53.18 |
| hydration 1:4. | 4                   | 1               | 58.54                 | 3.03 | 4.03 | 4.92 | 54.69 |
|                |                     | 2               | 58.51                 | 2.99 | 4.01 | 5.06 | 55.18 |
|                |                     | 6               | 58.74                 | 3.05 | 4.79 | 5.68 | 57.51 |
|                |                     | 12              | 58.71                 | 3.02 | 4.72 | 5.6  | 57.41 |
|                | -21                 | 1               | 58.61                 | 3.05 | 4.76 | 5.61 | 57.47 |
|                |                     | 2               | 58.24                 | 3.07 | 4.74 | 5.65 | 57.03 |
|                |                     | 6               | 57.80                 | 3.02 | 4.88 | 5.74 | 57.34 |
|                |                     | 12              | 58.93                 | 3.06 | 4.1  | 5.41 | 57.67 |
|                | -76                 | 1               | 58.68                 | 3.21 | 3.79 | 5.41 | 57.03 |
|                |                     | 2               | 57.60                 | 3.17 | 4.02 | 5.12 | 55.98 |
|                |                     | 6               | 57.70                 | 3.15 | 3.90 | 5.02 | 57.69 |
|                |                     | 12              | 58.68                 | 3.02 | 4.71 | 5.48 | 86.23 |

**Table S3.** The colour parameters of fortified broccoli with KI.

| Hydration      | Temperature<br>[°C] | Time<br>[hours] | The colour parameters |       |      |      |       |
|----------------|---------------------|-----------------|-----------------------|-------|------|------|-------|
|                |                     |                 | L                     | a     | b    | C    | h     |
| hydration 1:1. | 4                   | 1               | 57.31                 | -0.17 | 2.62 | 2.63 | 93.64 |
|                |                     | 2               | 57.17                 | -0.20 | 2.69 | 2.70 | 94.29 |
|                |                     | 6               | 57.15                 | -0.23 | 2.66 | 2.67 | 94.91 |
|                |                     | 12              | 57.12                 | -0.19 | 2.61 | 2.62 | 94.23 |
|                | -21                 | 1               | 57.03                 | 0.10  | 2.66 | 2.67 | 94.88 |
|                |                     | 2               | 57.16                 | -0.20 | 2.65 | 2.66 | 94.39 |
|                |                     | 6               | 57.83                 | 0.01  | 2.22 | 2.22 | 89.63 |
|                |                     | 12              | 57.82                 | 0.07  | 2.13 | 2.13 | 92.41 |
|                | -76                 | 1               | 57.18                 | 0.21  | 2.61 | 1.99 | 92.38 |
|                |                     | 2               | 57.77                 | 0.30  | 1.87 | 2.21 | 90.89 |
|                |                     | 6               | 57.64                 | 0.09  | 1.98 | 2.03 | 88.56 |
|                |                     | 12              | 57.65                 | 0.25  | 2.27 | 2.12 | 90.12 |
| hydration 1:2. | 4                   | 1               | 56.18                 | 0.22  | 2.66 | 2.67 | 90.23 |
|                |                     | 2               | 55.77                 | -0.15 | 2.98 | 2.61 | 92.70 |
|                |                     | 6               | 57.12                 | -0.17 | 3.11 | 2.12 | 93.08 |
|                |                     | 12              | 56.78                 | -0.08 | 3.08 | 2.09 | 91.57 |
|                | -21                 | 1               | 56.16                 | -0.05 | 2.97 | 2.97 | 90.88 |
|                |                     | 2               | 56.77                 | -0.05 | 2.99 | 2.37 | 91.98 |
|                |                     | 6               | 56.98                 | -0.13 | 3.31 | 2.56 | 92.32 |
|                |                     | 12              | 56.45                 | -0.25 | 2.98 | 2.26 | 90.21 |
|                | -76                 | 1               | 57.45                 | -0.26 | 3.04 | 2.48 | 93.14 |
|                |                     | 2               | 57.12                 | -0.16 | 3.02 | 3.32 | 92.68 |
|                |                     | 6               | 57.23                 | -0.13 | 3.34 | 2.21 | 92.28 |
|                |                     | 12              | 56.45                 | -0.19 | 2.98 | 2.20 | 91.89 |
| hydration 1:4. | 4                   | 1               | 57.97                 | 0.30  | 2.76 | 2.24 | 91.45 |
|                |                     | 2               | 57.96                 | 0.14  | 3.04 | 2.39 | 90.89 |
|                |                     | 6               | 57.90                 | 0.13  | 3.02 | 2.40 | 90.78 |
|                |                     | 12              | 56.28                 | 0.17  | 2.99 | 2.35 | 91.45 |
|                | -21                 | 1               | 57.75                 | 0.42  | 3.05 | 2.06 | 91.34 |
|                |                     | 2               | 57.88                 | 0.23  | 3.01 | 2.29 | 92.45 |
|                |                     | 6               | 56.45                 | -0.17 | 3.02 | 2.03 | 92.45 |
|                |                     | 12              | 56.89                 | -0.08 | 2.98 | 2.37 | 92.45 |
|                | -76                 | 1               | 57.23                 | 0.12  | 2.65 | 2.46 | 91.78 |
|                |                     | 2               | 57.12                 | -0.08 | 2.78 | 2.69 | 92.07 |
|                |                     | 6               | 56.89                 | -0.05 | 3.12 | 2.25 | 93.71 |
|                |                     | 12              | 56.45                 | 0.12  | 3.16 | 2.21 | 92.45 |

**Table S4.** The colour parameters of fortified broccoli with KIO<sub>3</sub>.

| Hydration      | Temperature<br>[°C] | Time<br>[hours] | The colour parameters |       |      |      |       |
|----------------|---------------------|-----------------|-----------------------|-------|------|------|-------|
|                |                     |                 | L                     | a     | b    | C    | h     |
| hydration 1:1. | 4                   | 1               | 57.29                 | -0.17 | 2.61 | 2.61 | 94.01 |
|                |                     | 2               | 57.09                 | -0.20 | 2.69 | 2.72 | 90.23 |
|                |                     | 6               | 57.02                 | -0.23 | 2.66 | 3.01 | 92.45 |
|                |                     | 12              | 57.12                 | -0.19 | 2.61 | 2.59 | 91.78 |
|                | -21                 | 1               | 56.65                 | 0.10  | 2.66 | 2.71 | 92.07 |
|                |                     | 2               | 57.03                 | -0.12 | 2.65 | 2.70 | 93.71 |
|                |                     | 6               | 57.83                 | -0.15 | 2.22 | 2.31 | 92.45 |
|                |                     | 12              | 57.82                 | -0.11 | 2.13 | 2.09 | 92.70 |
|                | -76                 | 1               | 57.18                 | -0.13 | 2.61 | 2.04 | 93.08 |
|                |                     | 2               | 57.77                 | -0.13 | 1.87 | 2.22 | 91.57 |
|                |                     | 6               | 57.64                 | -0.21 | 1.98 | 2.13 | 90.88 |
|                |                     | 12              | 57.65                 | -0.12 | 2.27 | 2.09 | 90.12 |
| hydration 1:2. | 4                   | 1               | 56.18                 | 0.11  | 2.66 | 2.19 | 91.29 |
|                |                     | 2               | 56.89                 | -0.08 | 2.98 | 2.12 | 90.23 |
|                |                     | 6               | 57.23                 | 0.12  | 2.65 | 2.21 | 91.03 |
|                |                     | 12              | 57.12                 | -0.09 | 2.51 | 2.22 | 90.32 |
|                | -21                 | 1               | 56.89                 | -0.23 | 2.49 | 2.09 | 92.31 |
|                |                     | 2               | 56.45                 | 0.08  | 2.44 | 2.03 | 91.03 |
|                |                     | 6               | 55.77                 | -0.15 | 2.98 | 2.12 | 90.45 |
|                |                     | 12              | 57.12                 | -0.17 | 2.23 | 2.21 | 91.23 |
|                | -76                 | 1               | 56.78                 | -0.08 | 2.51 | 2.19 | 90.31 |
|                |                     | 2               | 56.16                 | -0.05 | 2.97 | 2.54 | 90.34 |
|                |                     | 6               | 56.65                 | -0.05 | 2.37 | 2.49 | 91.98 |
|                |                     | 12              | 56.78                 | -0.13 | 2.31 | 2.16 | 92.32 |
| hydration 1:4. | 4                   | 1               | 57.03                 | -0.25 | 2.98 | 2.34 | 91.03 |
|                |                     | 2               | 57.29                 | -0.26 | 2.12 | 3.45 | 92.03 |
|                |                     | 6               | 57.03                 | -0.16 | 2.34 | 3.01 | 91.56 |
|                |                     | 12              | 56.98                 | -0.13 | 2.56 | 2.21 | 90.45 |
|                | -21                 | 1               | 57.24                 | -0.19 | 2.33 | 3.12 | 91.89 |
|                |                     | 2               | 57.12                 | -0.19 | 2.76 | 2.56 | 90.65 |
|                |                     | 6               | 57.36                 | -0.11 | 2.45 | 1.12 | 90.89 |
|                |                     | 12              | 56.98                 | 0.13  | 2.31 | 3.03 | 91.78 |
|                | -76                 | 1               | 57.03                 | 0.17  | 2.99 | 2.21 | 91.45 |
|                |                     | 2               | 57.75                 | 0.09  | 2.47 | 2.06 | 91.34 |
|                |                     | 6               | 57.88                 | 0.12  | 2.49 | 3.02 | 92.45 |
|                |                     | 12              | 56.45                 | -0.16 | 2.64 | 2.05 | 91.38 |

**Table S5.** The colour parameters of fortified cauliflower with KI.

| Hydration      | Temperature<br>[°C] | Time<br>[hours] | The colour parameters |       |      |      |       |
|----------------|---------------------|-----------------|-----------------------|-------|------|------|-------|
|                |                     |                 | L                     | a     | b    | C    | h     |
| hydration 1:1. | 4                   | 1               | 57.54                 | 0.28  | 3.67 | 3.68 | 87.46 |
|                |                     | 2               | 56.84                 | 0.22  | 3.87 | 3.88 | 87.67 |
|                |                     | 6               | 54.57                 | 0.29  | 4.00 | 4.01 | 87.69 |
|                |                     | 12              | 56.27                 | 0.14  | 3.85 | 3.86 | 87.95 |
|                | -21                 | 1               | 56.33                 | 0.22  | 3.80 | 3.81 | 89.54 |
|                |                     | 2               | 56.31                 | 0.23  | 3.84 | 3.85 | 90.13 |
|                |                     | 6               | 60.52                 | 0.42  | 3.60 | 3.62 | 83.30 |
|                |                     | 12              | 60.25                 | 0.37  | 3.74 | 3.76 | 84.38 |
|                | -76                 | 1               | 60.14                 | 0.39  | 3.70 | 3.72 | 83.96 |
|                |                     | 2               | 59.94                 | 0.31  | 3.72 | 3.73 | 85.21 |
|                |                     | 6               | 59.98                 | 0.38  | 3.69 | 3.71 | 90.26 |
|                |                     | 12              | 60.17                 | 0.37  | 3.69 | 3.71 | 84.20 |
| hydration 1:2. | 4                   | 1               | 60.37                 | 0.62  | 3.43 | 3.49 | 88.56 |
|                |                     | 2               | 60.61                 | 0.59  | 3.60 | 3.65 | 80.72 |
|                |                     | 6               | 60.52                 | 0.55  | 3.61 | 3.65 | 81.37 |
|                |                     | 12              | 60.63                 | 0.45  | 3.64 | 3.67 | 82.91 |
|                | -21                 | 1               | 60.67                 | 0.52  | 3.58 | 3.61 | 81.74 |
|                |                     | 2               | 60.56                 | 0.55  | 3.57 | 3.61 | 81.30 |
|                |                     | 6               | 58.06                 | -0.15 | 4.53 | 4.53 | 91.09 |
|                |                     | 12              | 55.09                 | -0.16 | 4.30 | 3.98 | 90.23 |
|                | -76                 | 1               | 54.98                 | -0.20 | 4.27 | 4.27 | 89.45 |
|                |                     | 2               | 54.81                 | -0.19 | 4.24 | 4.24 | 89.45 |
|                |                     | 6               | 54.97                 | -0.28 | 4.26 | 4.06 | 89.45 |
|                |                     | 12              | 55.58                 | -0.20 | 4.32 | 4.32 | 90.23 |
| hydration 1:4. | 4                   | 1               | 59.93                 | -0.08 | 3.87 | 3.87 | 91.21 |
|                |                     | 2               | 60.93                 | 0.18  | 3.47 | 3.48 | 87.00 |
|                |                     | 6               | 60.57                 | 0.03  | 3.64 | 3.64 | 89.47 |
|                |                     | 12              | 60.28                 | -0.02 | 3.78 | 3.78 | 90.31 |
|                | -21                 | 1               | 60.16                 | -0.05 | 3.82 | 3.82 | 90.71 |
|                |                     | 2               | 60.37                 | 0.01  | 3.72 | 3.72 | 89.74 |
|                |                     | 6               | 60.58                 | 0.59  | 3.57 | 3.62 | 88.45 |
|                |                     | 12              | 60.91                 | 0.32  | 4.01 | 4.03 | 88.78 |
|                | -76                 | 1               | 60.38                 | 0.18  | 4.21 | 3.99 | 87.49 |
|                |                     | 2               | 59.37                 | 0.05  | 4.41 | 4.41 | 89.33 |
|                |                     | 6               | 58.99                 | 0.07  | 4.46 | 4.06 | 89.06 |
|                |                     | 12              | 60.05                 | 0.24  | 4.13 | 4.15 | 86.38 |

**Table S6.** The colour parameters of fortified cauliflower with KIO<sub>3</sub>.

| Hydration      | Temperature<br>[°C] | Time<br>[hours] | The colour parameters |       |      |      |       |
|----------------|---------------------|-----------------|-----------------------|-------|------|------|-------|
|                |                     |                 | L                     | a     | b    | C    | h     |
| hydration 1:1. | 4                   | 1               | 57.45                 | 0.26  | 3.66 | 3.66 | 90.21 |
|                |                     | 2               | 57.65                 | 0.25  | 4.21 | 3.87 | 89.89 |
|                |                     | 6               | 55.38                 | -0.11 | 3.98 | 3.98 | 87.00 |
|                |                     | 12              | 56.24                 | -0.13 | 3.75 | 3.90 | 87.45 |
|                | -21                 | 1               | 56.33                 | -0.12 | 3.45 | 3.79 | 90.31 |
|                |                     | 2               | 56.31                 | 0.12  | 3.61 | 3.86 | 90.71 |
|                |                     | 6               | 55.45                 | -0.13 | 3.54 | 3.63 | 89.74 |
|                |                     | 12              | 56.23                 | -0.17 | 3.45 | 3.70 | 88.45 |
|                | -76                 | 1               | 56.48                 | -0.18 | 3.51 | 3.70 | 88.78 |
|                |                     | 2               | 56.87                 | 0.18  | 3.61 | 3.69 | 87.49 |
|                |                     | 6               | 57.23                 | 0.03  | 3.58 | 3.55 | 89.33 |
|                |                     | 12              | 57.23                 | -0.02 | 3.73 | 3.69 | 89.06 |
| hydration 1:2. | 4                   | 1               | 57.48                 | -0.04 | 3.21 | 3.52 | 86.38 |
|                |                     | 2               | 57.69                 | 0.01  | 3.61 | 3.54 | 85.64 |
|                |                     | 6               | 56.98                 | 0.59  | 3.45 | 3.66 | 85.49 |
|                |                     | 12              | 56.48                 | 0.32  | 4.24 | 3.49 | 82.91 |
|                | -21                 | 1               | 55.98                 | 0.52  | 4.03 | 3.29 | 89.45 |
|                |                     | 2               | 57.67                 | 0.55  | 4.32 | 3.79 | 88.45 |
|                |                     | 6               | 57.46                 | -0.15 | 3.87 | 3.99 | 90.23 |
|                |                     | 12              | 56.03                 | -0.16 | 3.47 | 4.01 | 90.23 |
|                | -76                 | 1               | 56.89                 | -0.12 | 3.64 | 4.02 | 89.45 |
|                |                     | 2               | 57.03                 | -0.19 | 3.78 | 3.98 | 89.45 |
|                |                     | 6               | 56.48                 | -0.28 | 3.82 | 3.79 | 89.45 |
|                |                     | 12              | 56.36                 | -0.20 | 3.72 | 4.32 | 90.23 |
| hydration 1:4. | 4                   | 1               | 55.98                 | 0.21  | 3.42 | 3.64 | 89.61 |
|                |                     | 2               | 56.23                 | 0.18  | 3.51 | 4.01 | 87.00 |
|                |                     | 6               | 56.48                 | 0.12  | 3.49 | 3.79 | 89.47 |
|                |                     | 12              | 56.98                 | -0.02 | 3.77 | 4.02 | 90.31 |
|                | -21                 | 1               | 56.77                 | -0.05 | 3.73 | 3.77 | 90.71 |
|                |                     | 2               | 56.98                 | 0.01  | 3.49 | 3.69 | 89.74 |
|                |                     | 6               | 56.12                 | 0.59  | 3.97 | 3.78 | 88.45 |
|                |                     | 12              | 57.03                 | 0.32  | 3.99 | 3.78 | 88.78 |
|                | -76                 | 1               | 57.09                 | 0.18  | 3.49 | 4.01 | 87.49 |
|                |                     | 2               | 55.36                 | 0.05  | 3.21 | 3.65 | 89.33 |
|                |                     | 6               | 58.99                 | 0.07  | 3.98 | 3.70 | 89.06 |
|                |                     | 12              | 56.78                 | 0.24  | 4.01 | 3.70 | 89.45 |

**Table S7.** The colour parameters of fortified carrot with KI.

| Hydration      | Temperature<br>[°C] | Time<br>[hours] | The colour parameters |      |      |      |       |
|----------------|---------------------|-----------------|-----------------------|------|------|------|-------|
|                |                     |                 | L                     | a    | b    | C    | h     |
| hydration 1:1. | 4                   | 1               | 58.34                 | 2.64 | 3.01 | 4.99 | 50.01 |
|                |                     | 2               | 58.28                 | 3.02 | 3.05 | 5.01 | 50.45 |
|                |                     | 6               | 58.33                 | 2.76 | 2.92 | 5.02 | 49.52 |
|                |                     | 12              | 58.28                 | 3.01 | 2.86 | 4.99 | 49.71 |
|                | -21                 | 1               | 58.08                 | 2.60 | 3.17 | 4.99 | 50.56 |
|                |                     | 2               | 58.26                 | 2.67 | 2.98 | 5.21 | 50.03 |
|                |                     | 6               | 58.73                 | 2.98 | 3.06 | 5.21 | 50.26 |
|                |                     | 12              | 58.64                 | 3.01 | 3.08 | 4.98 | 50.21 |
|                | -76                 | 1               | 58.43                 | 3.39 | 3.10 | 4.99 | 50.39 |
|                |                     | 2               | 58.11                 | 3.47 | 3.12 | 5.21 | 50.45 |
|                |                     | 6               | 58.22                 | 3.51 | 3.10 | 5.75 | 50.31 |
|                |                     | 12              | 58.43                 | 3.48 | 3.15 | 5.64 | 50.12 |
| hydration 1:2. | 4                   | 1               | 58.30                 | 3.56 | 2.93 | 5.22 | 50.02 |
|                |                     | 2               | 58.42                 | 3.42 | 3.09 | 5.31 | 50.01 |
|                |                     | 6               | 58.29                 | 3.66 | 2.82 | 4.99 | 50.11 |
|                |                     | 12              | 58.17                 | 3.68 | 3.01 | 4.61 | 49.31 |
|                | -21                 | 1               | 58.16                 | 3.71 | 2.78 | 4.63 | 49.74 |
|                |                     | 2               | 58.27                 | 3.61 | 2.88 | 4.62 | 50.02 |
|                |                     | 6               | 58.64                 | 2.85 | 2.98 | 4.65 | 50.01 |
|                |                     | 12              | 58.93                 | 3.04 | 3.01 | 4.54 | 49.98 |
|                | -76                 | 1               | 59.01                 | 3.12 | 3.31 | 4.98 | 49.87 |
|                |                     | 2               | 58.90                 | 3.27 | 3.13 | 4.53 | 49.98 |
|                |                     | 6               | 58.80                 | 3.34 | 2.97 | 4.47 | 50.11 |
|                |                     | 12              | 58.86                 | 3.12 | 3.09 | 4.55 | 50.09 |
| hydration 1:4. | 4                   | 1               | 58.42                 | 3.42 | 3.09 | 5.31 | 50.01 |
|                |                     | 2               | 58.29                 | 3.66 | 2.82 | 4.99 | 50.11 |
|                |                     | 6               | 58.17                 | 3.68 | 3.01 | 4.61 | 49.31 |
|                |                     | 12              | 58.33                 | 2.76 | 2.92 | 5.02 | 49.52 |
|                | -21                 | 1               | 58.28                 | 3.01 | 2.86 | 4.99 | 49.71 |
|                |                     | 2               | 58.01                 | 2.65 | 3.17 | 5.01 | 50.54 |
|                |                     | 6               | 58.31                 | 2.78 | 2.98 | 4.98 | 50.03 |
|                |                     | 12              | 59.01                 | 3.08 | 3.31 | 4.96 | 50.78 |
|                | -76                 | 1               | 58.90                 | 3.27 | 3.13 | 4.53 | 49.98 |
|                |                     | 2               | 58.33                 | 2.89 | 2.92 | 4.87 | 50.19 |
|                |                     | 6               | 58.28                 | 3.01 | 2.86 | 4.99 | 49.71 |
|                |                     | 12              | 58.08                 | 3.02 | 3.17 | 5.02 | 50.56 |

**Table S8.** The colour parameters of fortified carrot with KIO<sub>3</sub>.

| Hydration      | Temperature<br>[°C] | Time<br>[hours] | The colour parameters |      |      |      |          |
|----------------|---------------------|-----------------|-----------------------|------|------|------|----------|
|                |                     |                 | L                     | a    | b    | C    | h        |
| hydration 1:1. | 4                   | 1               | 58.21                 | 2.66 | 3.02 | 4.99 | 49.98    |
|                |                     | 2               | 59.32                 | 2.69 | 3.01 | 5.01 | 50.45    |
|                |                     | 6               | 58.25                 | 3.01 | 3.00 | 5.02 | 49.52    |
|                |                     | 12              | 58.36                 | 3.02 | 3.00 | 4.99 | 49.71    |
|                | -21                 | 1               | 59.64                 | 2.78 | 2.98 | 4.99 | 50.51.00 |
|                |                     | 2               | 58.26                 | 2.89 | 3.03 | 5.21 | 50.23    |
|                |                     | 6               | 58.73                 | 2.98 | 2.98 | 5.21 | 50.03    |
|                |                     | 12              | 58.64                 | 2.87 | 2.99 | 4.98 | 49.89    |
|                | -76                 | 1               | 58.33                 | 3.02 | 3.12 | 4.99 | 49.78    |
|                |                     | 2               | 58.11                 | 2.98 | 2.87 | 5.21 | 50.41    |
|                |                     | 6               | 58.27                 | 3.21 | 2.76 | 5.75 | 50.31    |
|                |                     | 12              | 58.64                 | 3.12 | 3.09 | 5.64 | 50.12    |
| hydration 1:2. | 4                   | 1               | 58.76                 | 3.98 | 3.11 | 5.22 | 50.02    |
|                |                     | 2               | 59.01                 | 3.42 | 3.10 | 5.31 | 50.01    |
|                |                     | 6               | 58.90                 | 3.66 | 3.09 | 4.99 | 50.03    |
|                |                     | 12              | 58.80                 | 3.68 | 2.78 | 4.61 | 49.35    |
|                | -21                 | 1               | 58.86                 | 3.71 | 3.11 | 4.63 | 49.78    |
|                |                     | 2               | 58.41                 | 3.61 | 3.02 | 4.62 | 50.02    |
|                |                     | 6               | 58.30                 | 2.76 | 3.02 | 4.65 | 50.01    |
|                |                     | 12              | 58.17                 | 3.01 | 2.69 | 4.54 | 49.98    |
|                | -76                 | 1               | 58.33                 | 2.65 | 3.29 | 4.98 | 49.87    |
|                |                     | 2               | 58.28                 | 2.78 | 2.97 | 4.53 | 49.97    |
|                |                     | 6               | 58.01                 | 3.08 | 2.92 | 4.47 | 49.23    |
|                |                     | 12              | 58.31                 | 3.22 | 3.09 | 4.55 | 49.69    |
| hydration 1:4. | 4                   | 1               | 58.78                 | 2.89 | 2.91 | 5.31 | 50.03    |
|                |                     | 2               | 58.12                 | 3.01 | 2.82 | 4.99 | 50.11    |
|                |                     | 6               | 58.33                 | 3.04 | 2.99 | 4.61 | 49.31    |
|                |                     | 12              | 58.28                 | 3.12 | 3.01 | 5.02 | 49.78    |
|                | -21                 | 1               | 58.08                 | 3.27 | 2.99 | 4.99 | 49.71    |
|                |                     | 2               | 59.09                 | 3.34 | 3.12 | 5.01 | 50.54    |
|                |                     | 6               | 59.02                 | 3.12 | 3.02 | 4.98 | 50.21    |
|                |                     | 12              | 58.30                 | 3.42 | 3.31 | 4.96 | 49.69    |
|                | -76                 | 1               | 58.42                 | 3.66 | 3.00 | 4.53 | 49.98    |
|                |                     | 2               | 58.29                 | 3.68 | 2.99 | 4.87 | 50.09    |
|                |                     | 6               | 58.17                 | 2.95 | 2.86 | 4.99 | 49.71    |
|                |                     | 12              | 58.16                 | 3.02 | 3.06 | 5.02 | 50.21    |



**Table S9.** The iodine content (%) during 230 days storage of the dried KI fortified pumpkin at various conditions (temperature, hydration and time).

| Hydration      | Temperature<br>[°C] | Time [hours] | Iodine content [%] |       |       |       |       |       |       |
|----------------|---------------------|--------------|--------------------|-------|-------|-------|-------|-------|-------|
|                |                     |              | Storage [days]     |       |       |       |       |       |       |
|                |                     |              | 30                 | 60    | 90    | 120   | 150   | 180   | 230   |
| hydration 1:1. | 4                   | 1            | 96.67              | 91.77 | 89.68 | 86.29 | 83.88 | 80.38 | 72.74 |
|                |                     | 2            | 96.68              | 92.10 | 89.82 | 85.44 | 83.77 | 80.92 | 71.41 |
|                |                     | 6            | 95.61              | 89.70 | 88.91 | 84.88 | 82.50 | 80.01 | 72.09 |
|                |                     | 12           | 94.36              | 90.15 | 87.37 | 86.01 | 81.73 | 77.57 | 70.11 |
|                | -21                 | 1            | 97.56              | 92.57 | 91.21 | 88.35 | 84.77 | 82.26 | 73.94 |
|                |                     | 2            | 97.54              | 91.68 | 91.35 | 87.92 | 86.03 | 82.30 | 74.45 |
|                |                     | 6            | 96.45              | 90.57 | 89.13 | 86.38 | 85.54 | 81.66 | 73.76 |
|                |                     | 12           | 96.04              | 90.15 | 88.57 | 85.57 | 83.76 | 81.70 | 73.85 |
|                | -76                 | 1            | 97.05              | 93.10 | 91.15 | 88.64 | 84.97 | 81.68 | 78.33 |
|                |                     | 2            | 97.03              | 93.10 | 91.10 | 88.60 | 84.75 | 81.65 | 78.56 |
|                |                     | 6            | 97.12              | 92.98 | 91.09 | 88.23 | 84.69 | 81.89 | 78.03 |
|                |                     | 12           | 97.01              | 93.21 | 91.23 | 88.67 | 84.99 | 81.28 | 78.29 |
| hydration 1:2. | 4                   | 1            | 97.56              | 92.57 | 91.21 | 88.35 | 84.77 | 82.26 | 73.90 |
|                |                     | 2            | 97.54              | 91.68 | 91.35 | 87.92 | 86.03 | 82.31 | 74.45 |
|                |                     | 6            | 96.45              | 90.57 | 89.13 | 86.38 | 85.51 | 81.66 | 73.76 |
|                |                     | 12           | 96.04              | 90.16 | 88.57 | 85.57 | 83.76 | 81.70 | 73.85 |
|                | -21                 | 1            | 97.56              | 92.57 | 91.21 | 88.35 | 84.77 | 82.26 | 73.94 |
|                |                     | 2            | 97.99              | 91.68 | 91.35 | 87.92 | 86.03 | 82.30 | 74.45 |
|                |                     | 6            | 97.23              | 90.57 | 89.13 | 86.38 | 85.54 | 81.66 | 73.76 |
|                |                     | 12           | 96.98              | 90.15 | 88.57 | 85.57 | 83.76 | 81.70 | 73.85 |
|                | -76                 | 1            | 97.11              | 93.45 | 91.16 | 88.69 | 84.78 | 81.29 | 78.25 |
|                |                     | 2            | 97.56              | 93.45 | 91.24 | 88.73 | 84.59 | 81.56 | 78.69 |
|                |                     | 6            | 97.23              | 93.09 | 91.03 | 88.56 | 84.23 | 81.79 | 78.46 |
|                |                     | 12           | 97.23              | 93.65 | 91.19 | 88.79 | 84.97 | 81.82 | 78.69 |
| hydration 1:4. | 4                   | 1            | 96.67              | 91.77 | 89.68 | 86.29 | 83.88 | 80.38 | 72.74 |
|                |                     | 2            | 96.68              | 92.10 | 89.82 | 85.44 | 83.77 | 80.92 | 71.41 |
|                |                     | 6            | 95.61              | 89.70 | 88.91 | 84.88 | 82.50 | 80.01 | 72.09 |
|                |                     | 12           | 94.36              | 90.15 | 87.37 | 86.01 | 81.73 | 77.57 | 70.11 |
|                | -21                 | 1            | 97.56              | 92.57 | 91.21 | 88.35 | 84.77 | 82.26 | 73.94 |
|                |                     | 2            | 97.54              | 91.68 | 91.35 | 87.92 | 86.03 | 82.30 | 74.45 |
|                |                     | 6            | 96.45              | 90.57 | 89.13 | 86.38 | 85.54 | 81.66 | 73.76 |
|                |                     | 12           | 96.04              | 90.15 | 88.57 | 85.57 | 83.76 | 81.70 | 73.85 |
|                | -76                 | 1            | 97.05              | 93.10 | 91.15 | 88.64 | 84.97 | 81.68 | 78.33 |
|                |                     | 2            | 97.03              | 93.10 | 91.10 | 88.60 | 84.75 | 81.65 | 78.56 |
|                |                     | 6            | 97.12              | 92.98 | 91.09 | 88.23 | 84.69 | 81.89 | 78.03 |
|                |                     | 12           | 97.01              | 93.21 | 91.23 | 88.67 | 84.99 | 81.28 | 78.29 |

**Table S10.** The iodine content (%) during 230 days storage of the dried KIO<sub>3</sub> fortified pumpkin at various conditions (temperature, hydration and time).

| Hydration      | Temperature<br>[°C] | Time [hours] | Iodine content [%] |       |       |       |       |       |       |
|----------------|---------------------|--------------|--------------------|-------|-------|-------|-------|-------|-------|
|                |                     |              | Storage [days]     |       |       |       |       |       |       |
|                |                     |              | 30                 | 60    | 90    | 120   | 150   | 180   | 230   |
| hydration 1:1. | 4                   | 1            | 97.87              | 95.05 | 93.42 | 92.19 | 88.34 | 85.03 | 81.61 |
|                |                     | 2            | 97.88              | 95.13 | 93.25 | 92.39 | 88.96 | 85.12 | 81.03 |
|                |                     | 6            | 96.80              | 94.91 | 92.90 | 91.29 | 88.03 | 84.56 | 81.11 |
|                |                     | 12           | 96.37              | 94.94 | 91.69 | 91.03 | 87.23 | 84.03 | 80.89 |
|                | -21                 | 1            | 97.23              | 95.23 | 94.41 | 92.36 | 89.26 | 84.98 | 80.03 |
|                |                     | 2            | 97.56              | 95.29 | 94.24 | 92.56 | 88.20 | 85.12 | 81.38 |
|                |                     | 6            | 97.69              | 95.03 | 94.69 | 92.77 | 88.37 | 85.09 | 81.26 |
|                |                     | 12           | 97.26              | 95.45 | 94.78 | 92.03 | 88.21 | 85.77 | 81.80 |
|                | -76                 | 1            | 98.26              | 95.98 | 94.01 | 92.32 | 88.65 | 84.50 | 81.20 |
|                |                     | 2            | 98.31              | 95.45 | 94.01 | 92.41 | 88.03 | 84.61 | 81.31 |
|                |                     | 6            | 98.19              | 95.99 | 94.12 | 92.09 | 88.15 | 84.60 | 81.29 |
|                |                     | 12           | 98.29              | 95.79 | 94.12 | 92.19 | 88.19 | 84.41 | 81.19 |
| hydration 1:2. | 4                   | 1            | 97.54              | 95.21 | 93.12 | 90.53 | 88.12 | 83.82 | 76.21 |
|                |                     | 2            | 97.77              | 95.55 | 93.25 | 89.68 | 88.01 | 84.36 | 74.85 |
|                |                     | 6            | 96.80              | 93.22 | 92.42 | 89.19 | 86.88 | 83.52 | 75.60 |
|                |                     | 12           | 95.61              | 93.03 | 90.25 | 89.69 | 85.41 | 80.45 | 72.98 |
|                | -21                 | 1            | 98.55              | 95.45 | 94.12 | 92.03 | 88.45 | 85.14 | 80.23 |
|                |                     | 2            | 98.77              | 94.56 | 94.23 | 91.60 | 89.71 | 85.18 | 80.45 |
|                |                     | 6            | 97.65              | 93.45 | 92.01 | 90.06 | 89.22 | 84.54 | 80.31 |
|                |                     | 12           | 97.99              | 93.06 | 91.46 | 90.65 | 87.44 | 84.58 | 79.81 |
|                | -76                 | 1            | 98.26              | 95.98 | 94.03 | 92.32 | 88.56 | 84.55 | 81.19 |
|                |                     | 2            | 98.44              | 95.75 | 94.03 | 92.45 | 88.23 | 84.32 | 81.22 |
|                |                     | 6            | 98.61              | 95.29 | 94.11 | 92.45 | 88.95 | 84.56 | 81.23 |
|                |                     | 12           | 98.38              | 95.73 | 94.03 | 92.03 | 88.79 | 84.35 | 81.26 |
| hydration 1:4. | 4                   | 1            | 97.87              | 94.65 | 92.56 | 89.97 | 87.56 | 83.26 | 75.65 |
|                |                     | 2            | 97.88              | 94.99 | 92.69 | 89.12 | 87.45 | 83.80 | 74.29 |
|                |                     | 6            | 96.80              | 92.59 | 91.79 | 88.56 | 86.25 | 82.89 | 74.97 |
|                |                     | 12           | 95.56              | 93.03 | 90.25 | 89.69 | 85.41 | 80.45 | 72.98 |
|                | -21                 | 1            | 98.76              | 95.45 | 94.12 | 91.98 | 88.03 | 84.23 | 76.82 |
|                |                     | 2            | 98.77              | 94.56 | 94.23 | 91.56 | 88.23 | 84.39 | 77.36 |
|                |                     | 6            | 97.65              | 93.45 | 92.01 | 90.56 | 88.32 | 84.54 | 76.64 |
|                |                     | 12           | 97.26              | 93.05 | 91.45 | 89.25 | 87.45 | 84.58 | 76.73 |
|                | -76                 | 1            | 98.25              | 95.98 | 94.03 | 92.32 | 88.65 | 84.56 | 81.21 |
|                |                     | 2            | 98.45              | 95.45 | 94.03 | 92.45 | 88.01 | 84.28 | 81.20 |
|                |                     | 6            | 98.41              | 95.99 | 94.11 | 92.45 | 88.39 | 84.79 | 81.64 |
|                |                     | 12           | 98.03              | 95.79 | 94.09 | 92.03 | 88.35 | 84.36 | 81.03 |

**Table S11.** The iodine content (%) during 230 days storage of the dried KI fortified broccoli at various conditions (temperature, hydration and time).

| Hydration      | Temperature<br>[°C] | Time [hours] | Iodine content [%] |       |       |       |       |       |       |
|----------------|---------------------|--------------|--------------------|-------|-------|-------|-------|-------|-------|
|                |                     |              | Storage [days]     |       |       |       |       |       |       |
|                |                     |              | 30                 | 60    | 90    | 120   | 150   | 180   | 230   |
| hydration 1:1. | 4                   | 1            | 97.54              | 93.00 | 93.03 | 87.95 | 84.03 | 81.26 | 78.89 |
|                |                     | 2            | 97.00              | 95.98 | 90.68 | 87.96 | 83.98 | 81.37 | 78.65 |
|                |                     | 6            | 96.03              | 92.03 | 91.99 | 87.42 | 83.78 | 80.56 | 77.56 |
|                |                     | 12           | 96.19              | 91.89 | 89.78 | 86.95 | 82.76 | 80.03 | 77.43 |
|                | -21                 | 1            | 97.51              | 93.00 | 90.79 | 87.98 | 82.89 | 81.98 | 78.56 |
|                |                     | 2            | 97.03              | 92.56 | 90.99 | 88.12 | 83.81 | 81.56 | 78.69 |
|                |                     | 6            | 97.12              | 92.78 | 90.93 | 87.95 | 83.79 | 82.56 | 78.45 |
|                |                     | 12           | 96.87              | 92.83 | 89.00 | 87.93 | 83.59 | 82.12 | 78.69 |
|                | -76                 | 1            | 96.54              | 93.00 | 90.56 | 88.03 | 83.00 | 82.37 | 78.19 |
|                |                     | 2            | 96.48              | 92.79 | 90.79 | 87.69 | 82.98 | 82.19 | 78.98 |
|                |                     | 6            | 96.37              | 92.98 | 90.65 | 88.02 | 82.97 | 82.64 | 78.46 |
|                |                     | 12           | 96.87              | 92.94 | 90.89 | 87.73 | 83.11 | 81.98 | 78.69 |
| hydration 1:2. | 4                   | 1            | 97.55              | 92.50 | 91.03 | 88.30 | 85.48 | 82.26 | 73.89 |
|                |                     | 2            | 97.51              | 91.60 | 90.98 | 88.03 | 85.21 | 82.31 | 74.50 |
|                |                     | 6            | 96.40              | 90.02 | 88.45 | 85.89 | 84.97 | 81.66 | 73.50 |
|                |                     | 12           | 96.01              | 89.59 | 87.79 | 85.01 | 82.89 | 81.70 | 72.89 |
|                | -21                 | 1            | 97.12              | 92.03 | 90.78 | 87.79 | 84.89 | 82.26 | 73.02 |
|                |                     | 2            | 97.45              | 91.25 | 90.76 | 87.12 | 84.21 | 82.30 | 73.06 |
|                |                     | 6            | 97.03              | 90.03 | 89.00 | 86.03 | 83.56 | 81.66 | 73.54 |
|                |                     | 12           | 96.24              | 90.01 | 88.03 | 85.09 | 82.98 | 81.70 | 73.01 |
|                | -76                 | 1            | 97.10              | 92.89 | 90.59 | 88.02 | 83.78 | 81.29 | 77.89 |
|                |                     | 2            | 97.12              | 92.99 | 90.12 | 87.73 | 83.45 | 81.56 | 77.56 |
|                |                     | 6            | 97.39              | 92.71 | 90.79 | 87.69 | 83.45 | 81.79 | 77.39 |
|                |                     | 12           | 97.02              | 92.75 | 90.43 | 88.02 | 83.89 | 81.82 | 77.67 |
| hydration 1:4. | 4                   | 1            | 96.66              | 91.76 | 89.60 | 86.30 | 83.87 | 80.12 | 72.45 |
|                |                     | 2            | 96.69              | 92.11 | 89.80 | 85.41 | 83.50 | 80.11 | 71.03 |
|                |                     | 6            | 96.03              | 89.50 | 88.92 | 84.78 | 82.41 | 79.25 | 71.23 |
|                |                     | 12           | 94.35              | 90.15 | 87.35 | 86.01 | 81.25 | 77.00 | 69.78 |
|                | -21                 | 1            | 97.55              | 92.50 | 91.20 | 88.24 | 84.72 | 81.25 | 74.03 |
|                |                     | 2            | 97.50              | 91.50 | 91.34 | 87.85 | 86.00 | 81.45 | 73.49 |
|                |                     | 6            | 96.45              | 90.56 | 89.10 | 86.21 | 85.21 | 81.02 | 73.26 |
|                |                     | 12           | 96.03              | 90.14 | 88.56 | 85.61 | 83.61 | 80.59 | 73.03 |
|                | -76                 | 1            | 97.06              | 93.08 | 91.10 | 88.50 | 84.02 | 81.45 | 78.03 |
|                |                     | 2            | 97.03              | 93.11 | 91.11 | 88.48 | 84.89 | 81.38 | 77.99 |
|                |                     | 6            | 97.09              | 93.12 | 91.08 | 88.39 | 84.91 | 81.25 | 77.89 |
|                |                     | 12           | 97.12              | 93.21 | 91.05 | 88.45 | 84.79 | 81.19 | 78.01 |

**Table S12.** The iodine content (%) during 230 days storage of the dried KIO<sub>3</sub> fortified broccoli at various conditions (temperature, hydration and time).

| Hydration      | Temperature<br>[°C] | Time [hours] | Iodine content [%] |       |       |       |       |       |       |
|----------------|---------------------|--------------|--------------------|-------|-------|-------|-------|-------|-------|
|                |                     |              | Storage [days]     |       |       |       |       |       |       |
|                |                     |              | 30                 | 60    | 90    | 120   | 150   | 180   | 230   |
| hydration 1:1. | 4                   | 1            | 97.80              | 95.01 | 93.01 | 91.90 | 88.50 | 83.25 | 80.78 |
|                |                     | 2            | 97.77              | 95.00 | 94.98 | 91.98 | 88.42 | 83.36 | 80.89 |
|                |                     | 6            | 96.42              | 94.25 | 92.45 | 90.89 | 87.89 | 83.09 | 80.03 |
|                |                     | 12           | 96.03              | 93.98 | 91.60 | 90.78 | 86.97 | 82.97 | 79.03 |
|                | -21                 | 1            | 97.02              | 95.01 | 93.78 | 92.03 | 88.97 | 83.29 | 81.04 |
|                |                     | 2            | 97.03              | 94.93 | 93.89 | 92.01 | 88.99 | 82.19 | 80.79 |
|                |                     | 6            | 97.11              | 94.94 | 93.78 | 92.34 | 88.76 | 83.25 | 81.11 |
|                |                     | 12           | 96.97              | 94.83 | 93.45 | 92.09 | 88.62 | 83.06 | 80.78 |
|                | -76                 | 1            | 97.01              | 94.98 | 91.12 | 91.99 | 88.96 | 83.30 | 80.91 |
|                |                     | 2            | 96.98              | 95.01 | 93.11 | 91.89 | 89.03 | 83.31 | 81.09 |
|                |                     | 6            | 97.11              | 95.03 | 93.98 | 91.99 | 88.81 | 83.11 | 80.67 |
|                |                     | 12           | 96.89              | 94.93 | 93.78 | 91.78 | 88.97 | 83.35 | 80.56 |
| hydration 1:2. | 4                   | 1            | 97.50              | 95.20 | 92.80 | 90.00 | 88.02 | 83.50 | 76.03 |
|                |                     | 2            | 97.23              | 95.03 | 92.45 | 89.00 | 87.56 | 83.90 | 74.00 |
|                |                     | 6            | 96.56              | 93.02 | 91.45 | 88.78 | 86.72 | 83.00 | 74.95 |
|                |                     | 12           | 95.45              | 92.89 | 89.78 | 88.21 | 84.78 | 80.01 | 72.00 |
|                | -21                 | 1            | 98.45              | 95.00 | 93.89 | 91.88 | 88.03 | 84.52 | 79.89 |
|                |                     | 2            | 98.45              | 94.03 | 93.82 | 91.56 | 88.94 | 84.78 | 79.91 |
|                |                     | 6            | 97.00              | 94.03 | 91.45 | 91.03 | 88.97 | 84.09 | 79.38 |
|                |                     | 12           | 97.03              | 92.78 | 91.00 | 91.09 | 87.68 | 84.01 | 79.50 |
|                | -76                 | 1            | 97.39              | 95.00 | 93.75 | 90.78 | 87.39 | 84.00 | 80.23 |
|                |                     | 2            | 97.89              | 95.14 | 93.67 | 91.56 | 87.25 | 83.75 | 80.98 |
|                |                     | 6            | 97.91              | 94.78 | 93.64 | 91.45 | 87.39 | 83.21 | 80.29 |
|                |                     | 12           | 97.68              | 94.38 | 93.50 | 91.29 | 87.25 | 83.56 | 80.78 |
| hydration 1:4. | 4                   | 1            | 97.86              | 97.64 | 92.50 | 89.70 | 87.50 | 83.20 | 75.03 |
|                |                     | 2            | 97.88              | 94.89 | 92.49 | 88.78 | 87.03 | 82.41 | 74.01 |
|                |                     | 6            | 96.89              | 92.50 | 91.40 | 87.89 | 85.74 | 81.79 | 73.89 |
|                |                     | 12           | 95.41              | 93.00 | 89.89 | 87.79 | 84.79 | 79.29 | 72.01 |
|                | -21                 | 1            | 98.70              | 95.40 | 94.10 | 90.56 | 87.79 | 83.08 | 76.23 |
|                |                     | 2            | 98.70              | 94.50 | 93.89 | 90.41 | 87.01 | 83.12 | 77.30 |
|                |                     | 6            | 97.60              | 93.30 | 91.99 | 91.03 | 87.00 | 82.99 | 77.29 |
|                |                     | 12           | 97.25              | 93.21 | 91.60 | 89.12 | 86.77 | 82.48 | 73.45 |
|                | -76                 | 1            | 98.19              | 95.02 | 93.78 | 91.89 | 88.01 | 83.29 | 80.78 |
|                |                     | 2            | 98.22              | 95.00 | 93.50 | 91.78 | 87.79 | 83.11 | 80.45 |
|                |                     | 6            | 98.21              | 94.89 | 93.59 | 91.99 | 87.91 | 83.15 | 80.23 |
|                |                     | 12           | 98.19              | 94.99 | 93.51 | 91.68 | 87.79 | 83.00 | 80.03 |

**Table S13.** The iodine content (%) during 230 days storage of the dried KI fortified cauliflower at various conditions (temperature, hydration and time).

| Hydration      | Temperature<br>[°C] | Time [hours] | Iodine content [%] |       |       |       |       |       |       |
|----------------|---------------------|--------------|--------------------|-------|-------|-------|-------|-------|-------|
|                |                     |              | Storage [days]     |       |       |       |       |       |       |
|                |                     |              | 30                 | 60    | 90    | 120   | 150   | 180   | 230   |
| hydration 1:1. | 4                   | 1            | 97.50              | 93.02 | 93.00 | 87.80 | 83.98 | 81.20 | 78.80 |
|                |                     | 2            | 97.03              | 93.12 | 92.52 | 87.90 | 83.89 | 81.19 | 78.60 |
|                |                     | 6            | 96.12              | 92.31 | 92.89 | 87.40 | 83.50 | 80.59 | 77.90 |
|                |                     | 12           | 96.15              | 91.56 | 89.95 | 87.00 | 82.98 | 80.06 | 77.06 |
|                | -21                 | 1            | 97.20              | 92.98 | 90.50 | 87.56 | 82.90 | 81.90 | 78.60 |
|                |                     | 2            | 97.05              | 92.49 | 90.45 | 87.98 | 82.78 | 81.86 | 78.60 |
|                |                     | 6            | 97.09              | 92.82 | 90.80 | 87.73 | 82.69 | 81.94 | 78.21 |
|                |                     | 12           | 96.95              | 92.90 | 90.12 | 87.88 | 82.54 | 82.02 | 78.20 |
|                | -76                 | 1            | 96.45              | 92.89 | 90.20 | 88.12 | 82.89 | 82.03 | 78.25 |
|                |                     | 2            | 96.23              | 92.89 | 89.99 | 88.03 | 82.65 | 82.01 | 78.61 |
|                |                     | 6            | 96.35              | 93.05 | 89.92 | 87.92 | 83.02 | 82.09 | 78.45 |
|                |                     | 12           | 96.45              | 92.90 | 90.45 | 87.96 | 82.61 | 81.96 | 78.03 |
| hydration 1:2. | 4                   | 1            | 97.54              | 90.51 | 91.03 | 88.21 | 85.50 | 82.30 | 73.90 |
|                |                     | 2            | 97.50              | 90.48 | 90.75 | 88.01 | 85.20 | 82.30 | 74.45 |
|                |                     | 6            | 96.50              | 89.98 | 88.12 | 85.89 | 84.90 | 81.70 | 72.49 |
|                |                     | 12           | 96.08              | 89.60 | 87.60 | 85.03 | 82.90 | 81.25 | 72.90 |
|                | -21                 | 1            | 97.10              | 92.06 | 90.50 | 87.60 | 84.70 | 82.30 | 75.69 |
|                |                     | 2            | 97.30              | 92.09 | 90.60 | 87.10 | 84.19 | 82.25 | 75.69 |
|                |                     | 6            | 97.09              | 90.12 | 89.25 | 86.69 | 83.60 | 82.03 | 76.03 |
|                |                     | 12           | 96.25              | 91.26 | 88.11 | 86.25 | 83.69 | 81.98 | 75.03 |
|                | -76                 | 1            | 97.10              | 92.89 | 91.03 | 86.56 | 83.50 | 81.26 | 76.35 |
|                |                     | 2            | 97.09              | 92.56 | 90.10 | 87.98 | 83.69 | 81.11 | 76.69 |
|                |                     | 6            | 97.20              | 92.45 | 90.60 | 87.69 | 83.45 | 81.03 | 76.78 |
|                |                     | 12           | 97.09              | 92.19 | 90.21 | 87.99 | 83.90 | 82.03 | 76.98 |
| hydration 1:4. | 4                   | 1            | 96.66              | 91.78 | 89.61 | 86.29 | 83.90 | 79.98 | 72.40 |
|                |                     | 2            | 96.70              | 92.10 | 89.60 | 85.64 | 83.51 | 79.99 | 71.03 |
|                |                     | 6            | 96.04              | 89.54 | 88.93 | 84.90 | 82.40 | 79.25 | 71.00 |
|                |                     | 12           | 94.31              | 90.14 | 87.41 | 86.01 | 82.30 | 74.03 | 69.69 |
|                | -21                 | 1            | 97.50              | 92.51 | 91.21 | 88.26 | 84.56 | 80.90 | 74.01 |
|                |                     | 2            | 97.51              | 91.48 | 91.32 | 87.46 | 85.03 | 80.56 | 73.30 |
|                |                     | 6            | 96.46              | 90.58 | 89.10 | 86.30 | 85.03 | 80.78 | 73.31 |
|                |                     | 12           | 96.01              | 90.21 | 88.98 | 85.60 | 84.25 | 80.12 | 72.98 |
|                | -76                 | 1            | 97.05              | 93.01 | 91.09 | 88.51 | 83.21 | 81.03 | 77.89 |
|                |                     | 2            | 97.03              | 93.10 | 91.22 | 88.47 | 84.75 | 81.11 | 77.98 |
|                |                     | 6            | 97.09              | 93.10 | 91.26 | 88.43 | 84.92 | 81.02 | 77.75 |
|                |                     | 12           | 97.05              | 93.09 | 91.09 | 88.51 | 83.54 | 81.03 | 77.35 |

**Table S14.** The iodine content (%) during 230 days storage of the dried KIO<sub>3</sub> fortified cauliflower at various conditions (temperature, hydration and time).

| Hydration      | Temperature<br>[°C] | Time [hours] | Iodine content [%] |       |       |       |       |       |       |
|----------------|---------------------|--------------|--------------------|-------|-------|-------|-------|-------|-------|
|                |                     |              | Storage [days]     |       |       |       |       |       |       |
|                |                     |              | 30                 | 60    | 90    | 120   | 150   | 180   | 230   |
| hydration 1:1. | 4                   | 1            | 97.81              | 95.02 | 93.12 | 91.91 | 88.52 | 84.80 | 80.78 |
|                |                     | 2            | 97.75              | 94.89 | 93.98 | 91.99 | 88.30 | 84.65 | 81.05 |
|                |                     | 6            | 97.69              | 94.56 | 93.12 | 90.90 | 87.90 | 84.05 | 80.95 |
|                |                     | 12           | 96.52              | 94.69 | 91.45 | 90.56 | 87.03 | 83.70 | 80.03 |
|                | -21                 | 1            | 97.00              | 95.00 | 93.70 | 92.04 | 88.90 | 84.60 | 81.02 |
|                |                     | 2            | 97.25              | 94.80 | 93.64 | 92.03 | 88.85 | 84.09 | 81.25 |
|                |                     | 6            | 97.13              | 94.79 | 93.70 | 90.30 | 88.70 | 84.01 | 81.60 |
|                |                     | 12           | 97.13              | 94.80 | 93.56 | 90.10 | 88.59 | 83.98 | 81.59 |
|                | -76                 | 1            | 97.03              | 94.86 | 92.98 | 90.80 | 88.90 | 84.12 | 81.53 |
|                |                     | 2            | 97.69              | 95.23 | 93.25 | 91.90 | 88.95 | 83.78 | 81.46 |
|                |                     | 6            | 97.45              | 95.03 | 93.65 | 91.50 | 89.03 | 84.23 | 81.70 |
|                |                     | 12           | 97.13              | 95.19 | 93.60 | 91.52 | 89.05 | 84.06 | 81.29 |
| hydration 1:2. | 4                   | 1            | 97.49              | 95.21 | 92.81 | 90.03 | 88.05 | 83.45 | 76.12 |
|                |                     | 2            | 97.26              | 95.98 | 92.60 | 89.11 | 87.60 | 83.80 | 74.02 |
|                |                     | 6            | 96.60              | 93.21 | 91.51 | 88.62 | 86.70 | 83.01 | 73.90 |
|                |                     | 12           | 95.50              | 92.90 | 89.80 | 88.15 | 84.80 | 79.98 | 72.65 |
|                | -21                 | 1            | 98.40              | 95.09 | 93.90 | 91.87 | 88.06 | 84.51 | 79.90 |
|                |                     | 2            | 98.39              | 97.12 | 93.71 | 91.55 | 88.72 | 84.50 | 79.89 |
|                |                     | 6            | 97.12              | 94.16 | 91.50 | 91.45 | 88.88 | 84.02 | 79.52 |
|                |                     | 12           | 97.09              | 92.90 | 92.03 | 91.23 | 87.70 | 81.03 | 79.40 |
|                | -76                 | 1            | 97.40              | 95.32 | 93.60 | 91.12 | 87.40 | 83.89 | 80.21 |
|                |                     | 2            | 97.23              | 95.29 | 93.54 | 91.09 | 87.21 | 83.98 | 79.56 |
|                |                     | 6            | 97.19              | 95.60 | 93.67 | 91.03 | 87.30 | 84.03 | 79.89 |
|                |                     | 12           | 97.21              | 95.12 | 93.45 | 91.12 | 87.35 | 83.70 | 79.98 |
| hydration 1:4. | 4                   | 1            | 97.88              | 95.69 | 92.48 | 89.60 | 87.60 | 83.21 | 75.00 |
|                |                     | 2            | 97.87              | 94.89 | 92.40 | 88.90 | 87.06 | 82.40 | 74.03 |
|                |                     | 6            | 96.80              | 92.45 | 91.35 | 87.56 | 85.78 | 81.80 | 73.80 |
|                |                     | 12           | 95.50              | 92.09 | 89.90 | 87.45 | 84.80 | 79.03 | 72.03 |
|                | -21                 | 1            | 98.71              | 95.02 | 94.11 | 90.45 | 87.80 | 83.01 | 76.03 |
|                |                     | 2            | 98.69              | 94.25 | 93.99 | 90.23 | 87.02 | 82.98 | 76.25 |
|                |                     | 6            | 97.61              | 93.25 | 92.03 | 90.09 | 87.02 | 83.01 | 76.98 |
|                |                     | 12           | 97.23              | 93.06 | 93.95 | 89.11 | 86.59 | 82.64 | 75.98 |
|                | -76                 | 1            | 98.20              | 94.98 | 93.45 | 90.98 | 87.87 | 83.12 | 80.90 |
|                |                     | 2            | 98.15              | 94.78 | 93.24 | 90.89 | 87.95 | 83.16 | 80.56 |
|                |                     | 6            | 98.34              | 94.01 | 93.09 | 91.56 | 87.35 | 83.02 | 80.45 |
|                |                     | 12           | 98.06              | 94.03 | 93.18 | 90.36 | 87.02 | 83.09 | 80.78 |

**Table S15.** The iodine content (%) during 230 days storage of the dried KI fortified carrot at various conditions (temperature, hydration and time).

| Hydration      | Temperature<br>[°C] | Time [hours] | Iodine content [%] |       |       |       |       |       |       |
|----------------|---------------------|--------------|--------------------|-------|-------|-------|-------|-------|-------|
|                |                     |              | Storage [days]     |       |       |       |       |       |       |
|                |                     |              | 30                 | 60    | 90    | 120   | 150   | 180   | 230   |
| hydration 1:1. | 4                   | 1            | 96.61              | 92.13 | 92.11 | 86.91 | 83.09 | 80.31 | 77.40 |
|                |                     | 2            | 96.15              | 92.23 | 91.63 | 87.01 | 83.00 | 80.30 | 77.20 |
|                |                     | 6            | 95.20              | 91.42 | 91.89 | 86.51 | 82.61 | 79.70 | 76.50 |
|                |                     | 12           | 95.21              | 90.67 | 89.68 | 86.11 | 82.09 | 79.17 | 75.63 |
|                | -21                 | 1            | 96.29              | 92.09 | 89.61 | 86.67 | 82.01 | 81.01 | 77.20 |
|                |                     | 2            | 96.20              | 91.61 | 89.60 | 87.09 | 81.80 | 80.97 | 77.17 |
|                |                     | 6            | 96.20              | 91.93 | 89.91 | 86.85 | 81.80 | 81.13 | 76.80 |
|                |                     | 12           | 96.06              | 91.90 | 89.23 | 86.99 | 81.66 | 81.13 | 76.77 |
|                | -76                 | 1            | 95.50              | 92.00 | 89.31 | 87.23 | 82.00 | 81.14 | 77.05 |
|                |                     | 2            | 95.31              | 92.10 | 89.10 | 87.14 | 81.76 | 81.12 | 76.89 |
|                |                     | 6            | 95.49              | 92.09 | 89.03 | 87.03 | 82.13 | 81.20 | 77.02 |
|                |                     | 12           | 95.60              | 92.01 | 89.56 | 87.07 | 81.72 | 81.07 | 77.03 |
| hydration 1:2. | 4                   | 1            | 96.64              | 89.61 | 90.13 | 87.31 | 84.60 | 81.40 | 73.01 |
|                |                     | 2            | 96.61              | 89.58 | 89.85 | 87.11 | 84.30 | 81.40 | 73.02 |
|                |                     | 6            | 95.62              | 89.08 | 87.21 | 84.99 | 84.01 | 80.80 | 72.03 |
|                |                     | 12           | 95.20              | 88.70 | 86.65 | 84.13 | 82.00 | 80.35 | 71.45 |
|                | -21                 | 1            | 96.27              | 91.16 | 89.61 | 86.70 | 83.80 | 81.40 | 74.79 |
|                |                     | 2            | 96.40              | 91.19 | 89.70 | 86.21 | 83.30 | 81.35 | 74.79 |
|                |                     | 6            | 96.19              | 89.22 | 88.35 | 85.80 | 82.69 | 81.13 | 75.13 |
|                |                     | 12           | 95.35              | 90.36 | 87.21 | 85.35 | 82.79 | 81.08 | 74.13 |
|                | -76                 | 1            | 96.21              | 91.99 | 90.13 | 85.70 | 82.60 | 80.40 | 75.41 |
|                |                     | 2            | 96.08              | 91.66 | 89.20 | 87.10 | 82.79 | 80.12 | 75.20 |
|                |                     | 6            | 96.12              | 91.55 | 89.70 | 87.02 | 82.55 | 80.29 | 75.13 |
|                |                     | 12           | 96.25              | 91.30 | 89.31 | 87.01 | 83.00 | 80.38 | 75.69 |
| hydration 1:4. | 4                   | 1            | 95.68              | 90.80 | 88.63 | 85.30 | 82.56 | 79.00 | 70.40 |
|                |                     | 2            | 95.72              | 91.12 | 88.62 | 84.66 | 81.98 | 79.01 | 69.07 |
|                |                     | 6            | 95.06              | 88.56 | 87.95 | 83.92 | 81.45 | 78.27 | 69.04 |
|                |                     | 12           | 93.30              | 89.12 | 86.40 | 85.03 | 80.10 | 73.02 | 67.73 |
|                | -21                 | 1            | 96.52              | 91.53 | 90.23 | 87.28 | 83.98 | 79.92 | 72.05 |
|                |                     | 2            | 96.53              | 90.50 | 90.34 | 86.48 | 84.05 | 79.58 | 71.34 |
|                |                     | 6            | 95.48              | 89.60 | 88.12 | 85.31 | 84.04 | 79.80 | 71.35 |
|                |                     | 12           | 95.03              | 89.23 | 88.00 | 84.90 | 83.27 | 79.14 | 71.02 |
|                | -76                 | 1            | 96.07              | 92.03 | 90.11 | 87.53 | 82.23 | 80.05 | 75.94 |
|                |                     | 2            | 96.05              | 92.12 | 90.20 | 87.49 | 83.77 | 80.13 | 75.98 |
|                |                     | 6            | 96.11              | 92.12 | 90.28 | 87.45 | 83.90 | 80.04 | 75.87 |
|                |                     | 12           | 96.07              | 92.11 | 90.11 | 87.53 | 82.56 | 80.05 | 75.62 |

**Table S16.** The iodine content (%) during 230 days storage of the dried KIO<sub>3</sub> fortified carrot at various conditions (temperature, hydration and time).

| Hydration      | Temperature<br>[°C] | Time [hours] | Iodine content [%] |       |       |       |       |       |       |
|----------------|---------------------|--------------|--------------------|-------|-------|-------|-------|-------|-------|
|                |                     |              | Storage [days]     |       |       |       |       |       |       |
|                |                     |              | 30                 | 60    | 90    | 120   | 150   | 180   | 230   |
| hydration 1:1. | 4                   | 1            | 97.10              | 94.30 | 92.41 | 91.21 | 87.82 | 84.10 | 78.45 |
|                |                     | 2            | 97.09              | 94.20 | 92.28 | 91.29 | 87.60 | 83.95 | 78.29 |
|                |                     | 6            | 97.26              | 93.80 | 92.12 | 90.20 | 87.20 | 83.35 | 78.09 |
|                |                     | 12           | 96.01              | 93.95 | 91.03 | 89.86 | 86.33 | 83.02 | 77.23 |
|                | -21                 | 1            | 97.03              | 94.28 | 92.59 | 91.34 | 88.21 | 83.90 | 78.99 |
|                |                     | 2            | 96.55              | 94.12 | 92.94 | 91.33 | 88.15 | 83.78 | 78.45 |
|                |                     | 6            | 96.43              | 94.10 | 93.05 | 89.60 | 88.00 | 83.31 | 78.38 |
|                |                     | 12           | 96.43              | 94.11 | 92.86 | 89.40 | 87.80 | 83.28 | 78.15 |
|                | -76                 | 1            | 96.98              | 94.32 | 92.28 | 90.10 | 86.45 | 82.20 | 78.45 |
|                |                     | 2            | 96.99              | 94.29 | 92.55 | 90.38 | 86.19 | 82.38 | 78.32 |
|                |                     | 6            | 96.75              | 94.31 | 92.49 | 90.80 | 86.56 | 82.01 | 78.02 |
|                |                     | 12           | 96.43              | 94.11 | 92.90 | 91.03 | 86.49 | 82.79 | 79.23 |
| hydration 1:2. | 4                   | 1            | 96.69              | 94.41 | 92.01 | 89.23 | 87.25 | 82.65 | 74.67 |
|                |                     | 2            | 96.46              | 95.18 | 91.80 | 88.31 | 86.80 | 83.00 | 72.56 |
|                |                     | 6            | 95.80              | 92.41 | 90.71 | 87.81 | 85.90 | 82.21 | 72.45 |
|                |                     | 12           | 94.71              | 92.10 | 89.00 | 87.36 | 84.00 | 80.20 | 71.21 |
|                | -21                 | 1            | 97.60              | 94.29 | 92.09 | 91.07 | 87.26 | 83.71 | 78.45 |
|                |                     | 2            | 97.59              | 96.32 | 92.91 | 90.75 | 87.92 | 83.70 | 78.44 |
|                |                     | 6            | 96.32              | 93.25 | 90.70 | 90.65 | 88.08 | 83.22 | 78.07 |
|                |                     | 12           | 96.29              | 92.10 | 91.23 | 90.44 | 86.90 | 80.23 | 77.95 |
|                | -76                 | 1            | 96.61              | 94.50 | 93.11 | 90.32 | 86.61 | 83.09 | 78.70 |
|                |                     | 2            | 96.50              | 94.50 | 92.80 | 90.32 | 86.30 | 83.18 | 78.60 |
|                |                     | 6            | 96.49              | 94.80 | 92.60 | 90.36 | 86.49 | 83.23 | 78.32 |
|                |                     | 12           | 96.62              | 94.60 | 92.55 | 90.29 | 86.45 | 82.90 | 78.39 |
| hydration 1:4. | 4                   | 1            | 96.92              | 94.73 | 91.52 | 88.64 | 86.64 | 82.25 | 73.10 |
|                |                     | 2            | 96.91              | 93.93 | 91.40 | 87.94 | 86.10 | 81.44 | 73.02 |
|                |                     | 6            | 95.84              | 91.49 | 90.39 | 86.60 | 84.82 | 80.84 | 71.78 |
|                |                     | 12           | 94.50              | 91.13 | 88.94 | 86.49 | 83.84 | 78.07 | 70.12 |
|                | -21                 | 1            | 97.75              | 94.06 | 93.15 | 89.49 | 86.84 | 82.05 | 74.11 |
|                |                     | 2            | 97.73              | 93.30 | 93.03 | 89.27 | 86.06 | 82.02 | 74.33 |
|                |                     | 6            | 96.66              | 92.29 | 91.07 | 89.13 | 86.06 | 82.05 | 75.06 |
|                |                     | 12           | 96.27              | 92.10 | 92.99 | 88.15 | 85.63 | 81.68 | 74.06 |
|                | -76                 | 1            | 97.20              | 94.02 | 92.50 | 90.10 | 86.91 | 82.16 | 78.21 |
|                |                     | 2            | 97.19              | 93.30 | 92.28 | 89.95 | 86.99 | 82.20 | 78.72 |
|                |                     | 6            | 97.38              | 93.02 | 92.13 | 90.03 | 86.41 | 82.11 | 78.12 |
|                |                     | 12           | 97.10              | 93.10 | 92.22 | 90.03 | 86.20 | 82.20 | 78.45 |
